# Supplementary material for: Oxymetholone Therapy of Fanconi Anemia Suppresses Osteopontin Transcription and Induces Hematopoietic Stem Cell Cycling
Source: PubMed Central journal article supplement — Stem Cell Reports. 2014 Nov 26;4(1):90–102. doi: 10.1016/j.stemcr.2014.10.014 (PMC4297866; doi:10.1016/j.stemcr.2014.10.014), 2014-11-26
Supplement: mmc1.pdf [file mmc1.pdf]

**Stem Cell Reports, Volume 4**

**Supplemental Information**

# **Oxymetholone Therapy of Fanconi Anemia Suppresses Osteopontin Transcription and Induces Hematopoietic Stem Cell Cycling**

**Qing-Shuo Zhang, Eric Benedetti, Matthew Deater, Kathryn Schubert, Angela Major,  
Carl Pelz, Soren Impey, Laura Marquez-Loza, R. Keaney Rathbun, Shigeaki Kato,  
Grover C. Bagby, and Markus Grompe**

## Supplemental Data

### *Supplementary figure legends:*

#### **Figure S1: OXM's bioactivity, related to Figure 2**

A). Representative kidney pictures for OXM- or placebo-treated mice. The mice under OXM treatment had larger kidney sizes than their placebo-treated controls. B). OXM-treated mice showed significantly higher kidney weights but maintained similar body weights. Data are pooled results from multiple mice (n = 9 for each group). C). *Oat* gene expression levels in the kidneys of OXM-treated mice were 75% lower than those in placebo-treated gender-matched controls. Data are pooled results from multiple mice (n = 4 for each group).

#### **Figure S2: OXM's effect on the proliferation of LIN<sup>+</sup> bone marrow cells, related to Figure 4**

Representative cell cycle profiles on LIN<sup>+</sup> cells from OXM-treated mice and their gender-matched placebo-treated littermate controls. For comparison purposes, the profiles were from the same mice used for representative KSL cell cycle profiles shown in Figure 4A. The denoted percentage for each gate was from an individual experiment.

#### **Figure S3: OXM's effect on the proliferation of LIN<sup>c</sup>-KIT<sup>+</sup>SCA-1<sup>-</sup> progenitor cells, related to Figure 4**

A). Statistical quantification of the cell cycle analysis on LIN<sup>c</sup>-KIT<sup>+</sup>SCA-1<sup>-</sup> cells in OXM-treated versus placebo-treated mice. Data represent the mean values from multiple mice (n = 9 for either OXM or placebo group of *Fancd2*<sup>-/-</sup> mice, n = 14 for *Fancd2*<sup>+/+</sup>

placebo group, and n = 10 for *Fancd2*<sup>+/+</sup> OXM group). B). Representative cell cycle profiles on LIN<sup>-</sup>c-KIT<sup>+</sup>SCA-1<sup>-</sup> cells from OXM-treated mice and their gender-matched placebo-treated littermate controls. For comparison purposes, the profiles were from the same mice used for representative KSL cell cycle profiles shown in Figure 4A. The denoted percentage for each gate was from an individual experiment.

**Figure S4: AR target site in intron 3 of *Spp1* gene, related to Figure 5**

A). Sequence of AR target site identified in a previous report (Massie et al., 2011). Note that the authors used human genome assembly version hg18. But the sequence remains the same with latest assembly version hg38. B). Bioinformatics analysis with UCSC PhyloP basewise conservation tool. The AR target site in *Spp1* gene intron 3 was highly conserved across different species. The green arrow indicates this intronic sequence. C). Representative pictures for immunohistochemistry staining of bone sections with anti-*Spp1* antibody. Femoral bone sections were stained with anti-osteopontin antibody (R&D Systems, Cat# AF808, 1:100 dilution) and shown in dark brown color. DAPI counterstaining was shown in blue. Original magnification: ×400.

**Figure S5: EPO's effects on hematopoiesis, related to Figure 5**

A). CBC tests of EPO-treated mice and placebo-treated controls. Data are pooled results from multiple mice (n = 6 for each group). B). Serum EPO levels in OXM-treated mice and placebo-treated controls. Data are pooled results from multiple mice (n = 8 for either OXM or placebo group of *Fancd2*<sup>+/+</sup> mice, n = 7 for either OXM or placebo group of *Fancd2*<sup>-/-</sup> mice) and presented as mean ± SEM. NS denotes not significant.

**Figure S6: *Spp1* gene expression level in SPKSL cells, related to Table 2**

*Spp1* gene expression level was from a search result in a previously published gene expression database of SPKSL cells (side population KSL cells, a highly enriched HSC population) (Chambers et al., 2007).

Supplementary figures

Figure S1

A

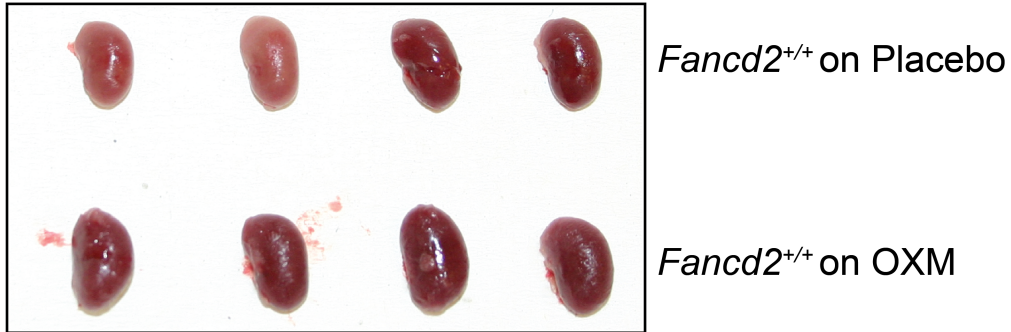

B

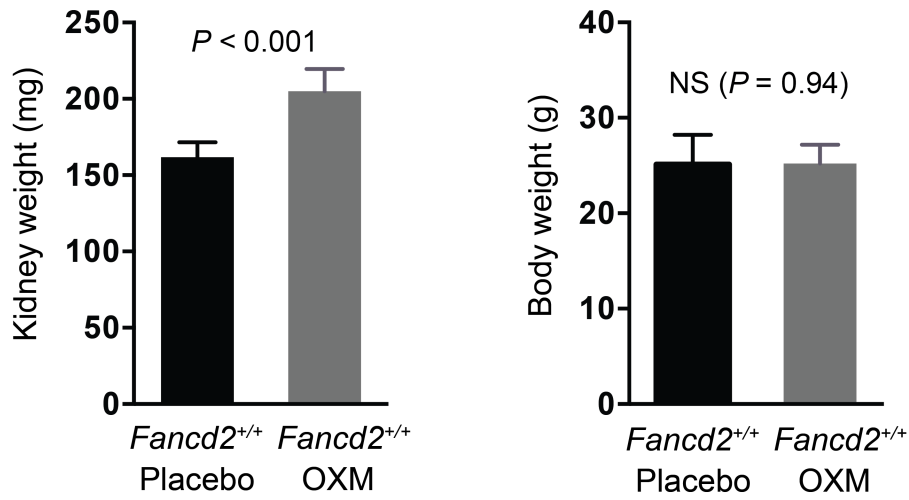

C

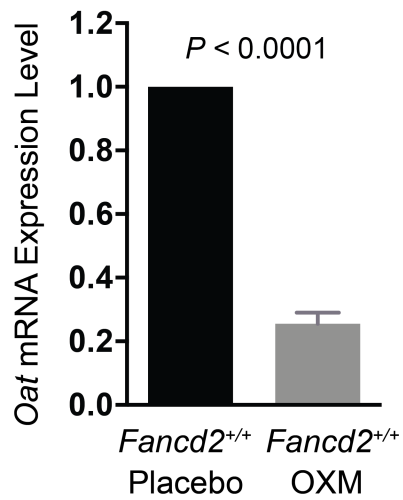

**Figure S2**

Placebo-treated *Fancd2*<sup>+/+</sup> LIN<sup>+</sup> cells:

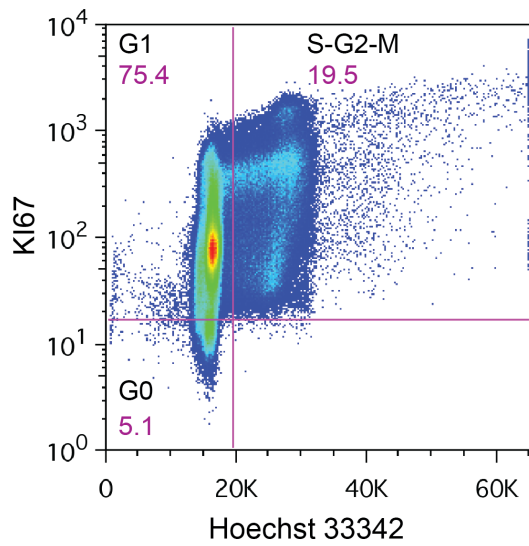

OXM-treated *Fancd2*<sup>+/+</sup> LIN<sup>+</sup> cells:

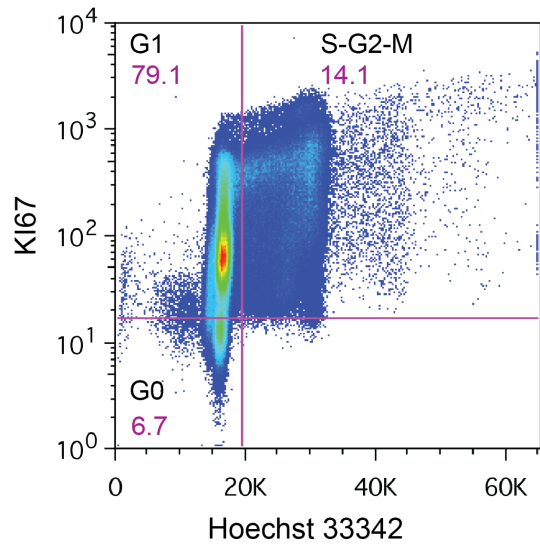

Placebo-treated *Fancd2*<sup>-/-</sup> LIN<sup>+</sup> cells:

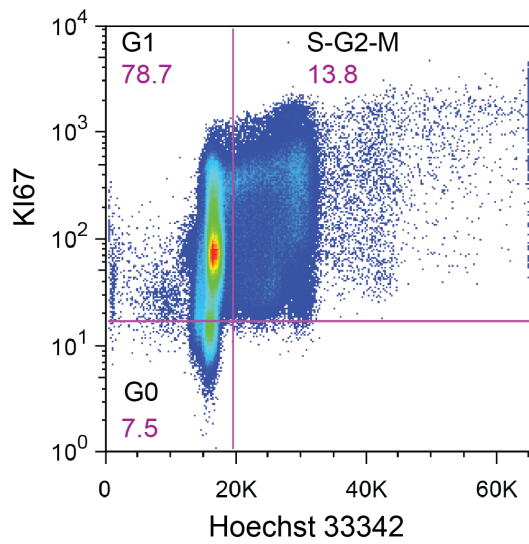

OXM-treated *Fancd2*<sup>-/-</sup> LIN<sup>+</sup> cells:

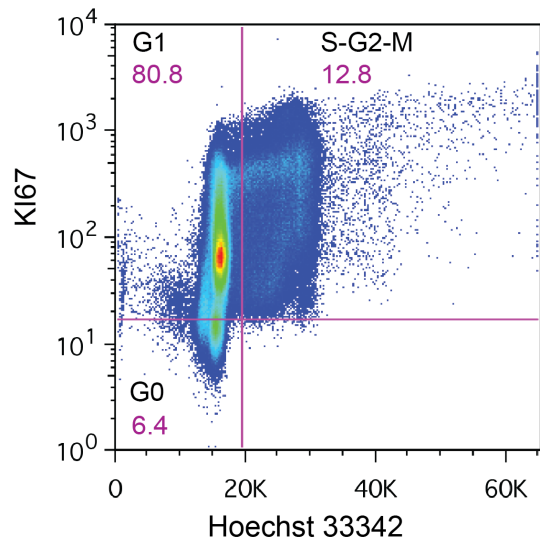

**Figure S3**

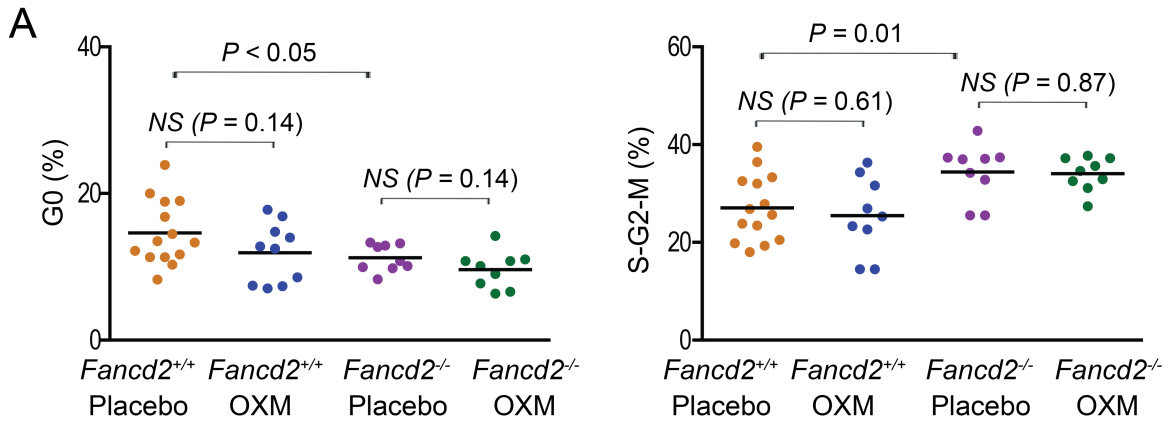

**B** *Fancd2*<sup>+/+</sup> LIN<sup>-</sup>c-KIT<sup>+</sup>SCA-1<sup>-</sup> cells / placebo      *Fancd2*<sup>+/+</sup> LIN<sup>-</sup>c-KIT<sup>+</sup>SCA-1<sup>-</sup> cells / OXM

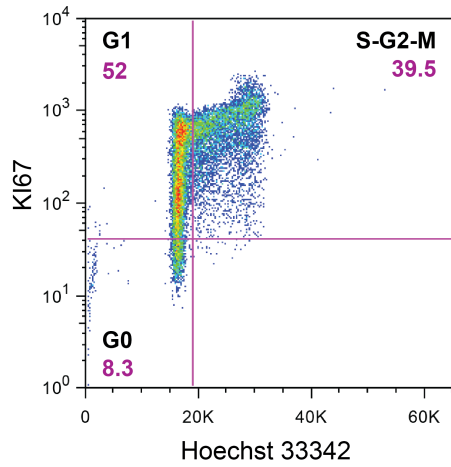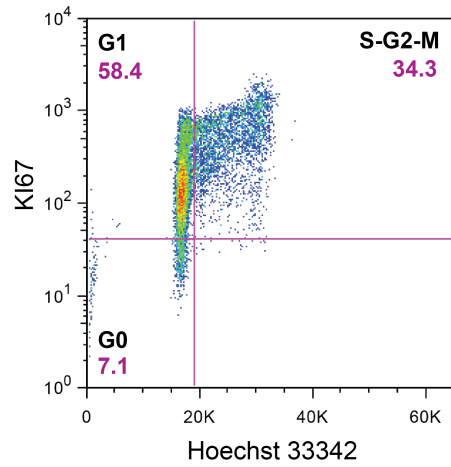

*Fancd2*<sup>-/-</sup> LIN<sup>-</sup>c-KIT<sup>+</sup>SCA-1<sup>-</sup> cells / placebo

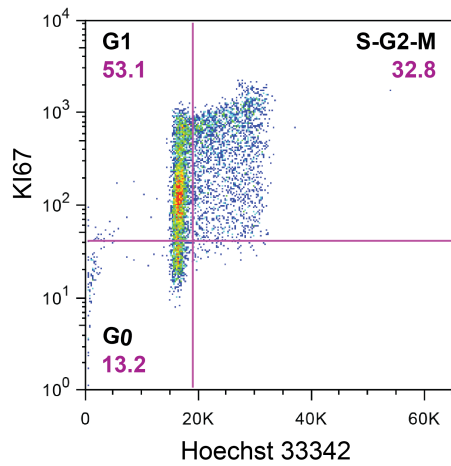

*Fancd2*<sup>-/-</sup> LIN<sup>-</sup>c-KIT<sup>+</sup>SCA-1<sup>-</sup> cells / OXM

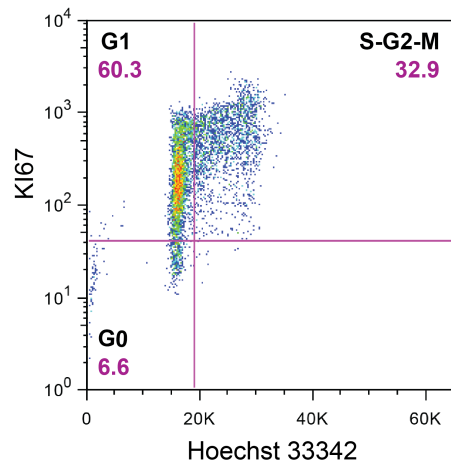

Figure S4

**A. AR target site in intron 3 of human *Spp1* gene**

TGACTGCCTGCTATGAATCTAGGCCAGTACCAAGCACAGTATAGTTTTTAATAAA  
TATAAGTTTATAAAACCAACCCAGATATTTTAAATATAATAATATCTAGGCATGT  
ATGATGAGTTATCGCATGTAAGATAAGTTATATGAAGTTGTGTGACTTTTTTTCC  
ATTAGTCCACATACTGATCTAAAAGCAGAAAATTCCAGCTTTTGCTTTGTTTGT  
GGATTGCTAAGTTTAAAATTCACATTGGATATTTAGTCAGAAGCTGTTTGTATGACC  
ATAATATTCACAATATTGTCTGAGATATTAGCTGAGAAGCCCATTGTGAAAAGAA  
AGTCTATGTGTGCTGTTTGTATCTATTGTGATTGTCAGCTGATGTTAGATCACAT  
TTTCTAACCAAACATAAGACCAACCAACTCTTTATTATAATTATTTGACCAGCA  
CTAAAGATGTACCTACCCCTCCACAACAGATGAAACTGTGCCAGCCAAACAACAA  
ATGGGCATTGTCCCAGAAGCTTGGACAAAAGGCACACAGAGTTCAATTCAGT  
TGAACAGAATAAAGGCCAAAATAGAGCTGCCTTGGGGGTCACCTGCAATTAGACTG  
CTAATGAAGACATTAAGAAGTATTCTGTGTTTCGTTTGTGTGTGGAGGGTGT  
GTGTGTCTGTTTTTCAACTGATTTGAAAATACAGGTGT

**B**

**UCSC Genome Browser on Human Mar. 2006 (NCBI36/hg18) Assembly**

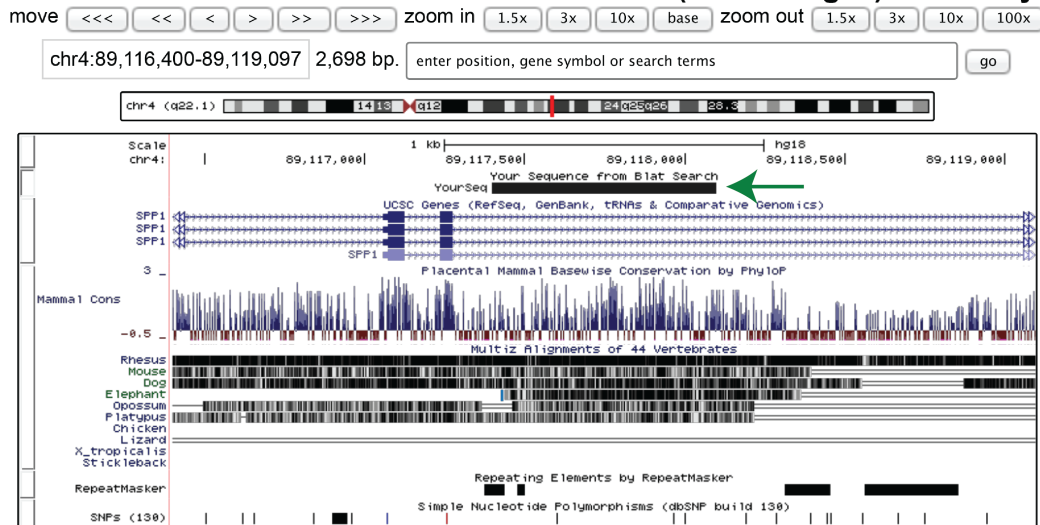

**C**

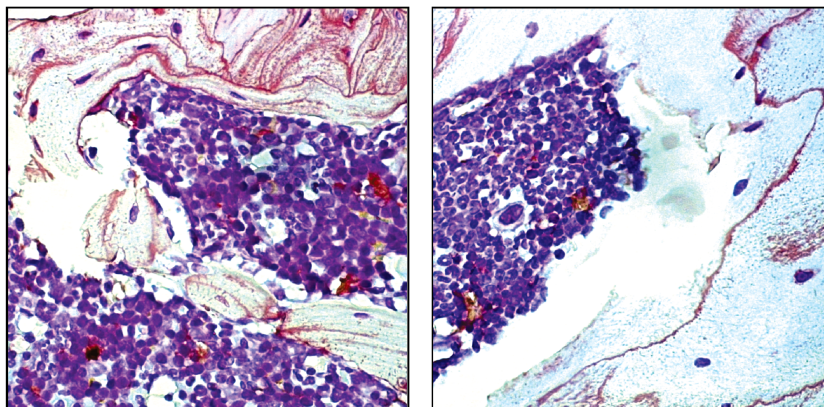

*Fancd2*<sup>-/-</sup> Placebo

*Fancd2*<sup>-/-</sup> OXM



**Figure S5**

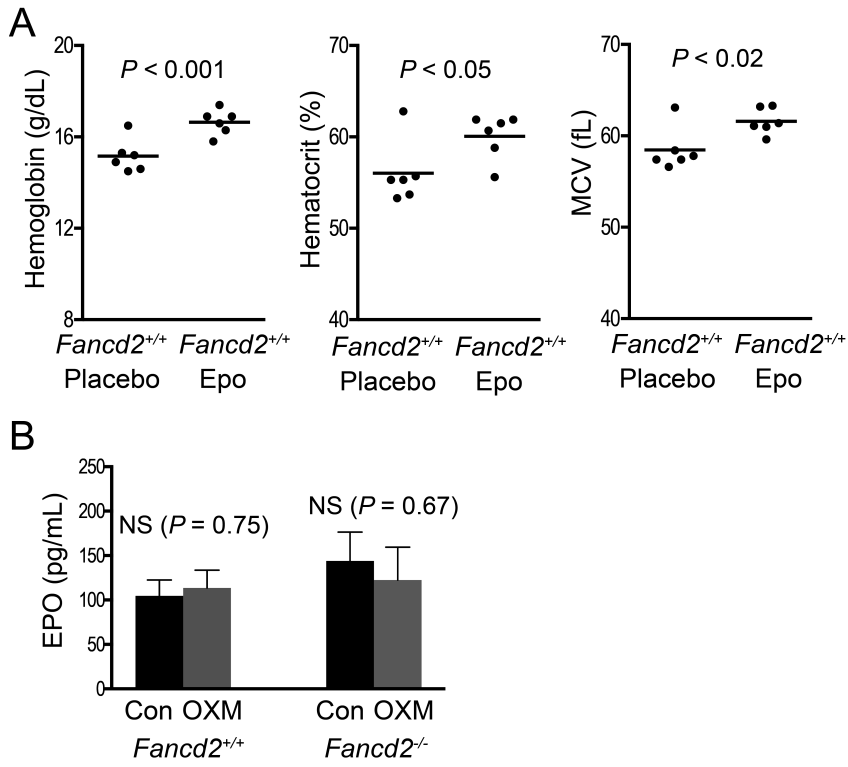

Figure S6:

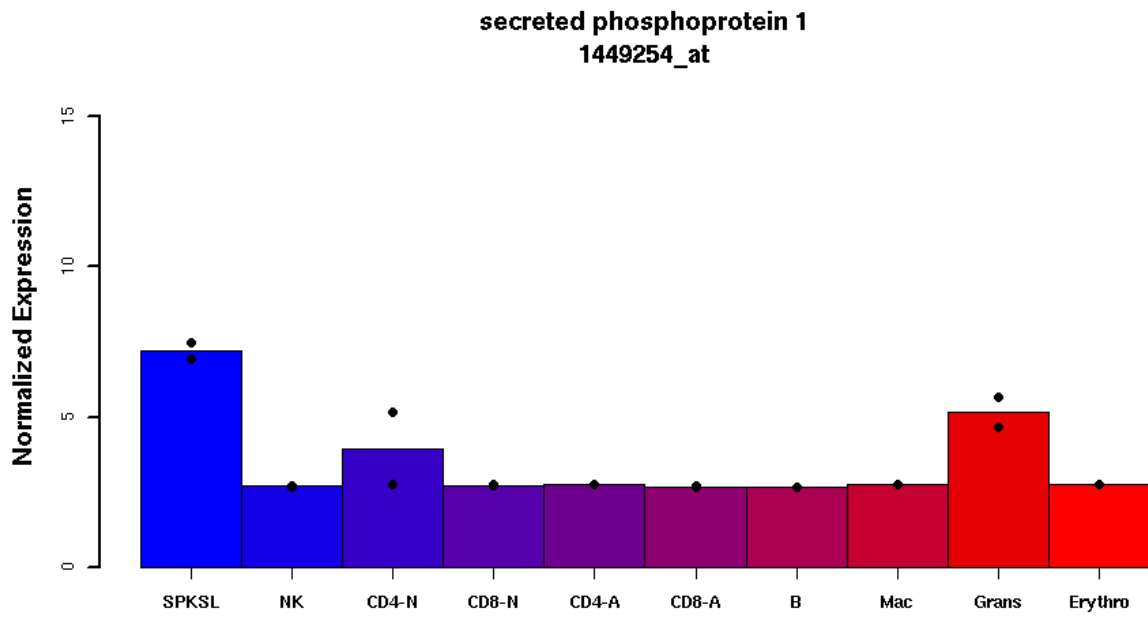

*Supplemental tables*

**Table S1: Blood counts in young adult *Fancd2*<sup>-/-</sup> and *Fancd2*<sup>+/+</sup> mice, related to**

**Figure 1**

|                                 | <i>Fancd2</i> <sup>+/+</sup> | <i>Fancd2</i> <sup>-/-</sup> | <i>p</i> |
|---------------------------------|------------------------------|------------------------------|----------|
| WBCs, x10 <sup>3</sup> /μL      | 6.7 ± 0.5                    | 6.8 ± 0.5                    | 0.92     |
| RBCs, x10 <sup>6</sup> /μL      | 10.0 ± 0.1                   | 9.9 ± 0.1                    | 0.38     |
| Hemoglobin, g/dL                | 14.9 ± 0.1                   | 15.1 ± 0.2                   | 0.25     |
| Hematocrit, %                   | 54.1 ± 0.6                   | 53.8 ± 0.5                   | 0.70     |
| MCV, fL                         | 54.1 ± 0.3                   | 55.1 ± 0.4                   | 0.03     |
| MCH, pg                         | 14.9 ± 0.1                   | 15.4 ± 0.1                   | 0.00     |
| MCHC, %                         | 27.6 ± 0.2                   | 27.9 ± 0.2                   | 0.23     |
| Platelets, x10 <sup>3</sup> /μL | 812 ± 32                     | 643 ± 22                     | 0.00     |

Comprehensive CBC tests were measured for *Fancd2*<sup>+/+</sup> and *Fancd2*<sup>-/-</sup> mice (4-6 months old, 23 mice in each group) by IDEXX Laboratories. Data were analyzed with Prism 6.0c software and presented as mean value ± SEM.

WBCs denotes white blood cells; RBCs, red blood cells; MCV, mean corpuscular volume; MCH, mean corpuscular hemoglobin; and MCHC, mean corpuscular hemoglobin concentration.

**Table S2: mRNA expression changes in *Fancd2*<sup>-/-</sup> KSL cells compared to wild-type KSL cells, related to Table 1**

– [See the Excel file for Table S2](#)

**Table S3: mRNA expression changes in wild-type KSL cells compared to wild-type whole bone marrow cells, related to Table 1**

– [See the Excel file for Table S3](#)

**Table S4: Lists of genes in the important pathways altered in *Fancd2*<sup>-/-</sup> HSPCs as compared to wild-type HSPCs, related to Table 1**

| Symbol                            | RefSeq ID    | Gene Name                             | Change | Q Value |
|-----------------------------------|--------------|---------------------------------------|--------|---------|
| Cell cycle regulation:            |              |                                       |        |         |
| <i>Ccna2</i>                      | NM_009828    | cyclin A2                             | 1.6    | 0.000   |
| <i>Ccnb1</i>                      | NM_172301    | cyclin B1                             | 2.0    | 0.000   |
| <i>Ccnb2</i>                      | NM_007630    | cyclin B2                             | 1.8    | 0.000   |
| <i>Ccnd1</i>                      | NM_007631    | cyclin D1                             | 1.7    | 0.000   |
| <i>Cdk1</i>                       | NM_007659    | cell division cycle 2 homolog A       | 1.8    | 0.000   |
| <i>Cdc25c</i>                     | NM_009860    | cell division cycle 25 homolog C      | 1.9    | 0.000   |
| <i>Cdca3</i>                      | NM_013538    | cell division cycle-associated 3      | 1.7    | 0.000   |
| <i>Cdkn3</i>                      | NM_028222    | Cyclin-Dependent Kinase Inhibitor 3   | 1.8    | 0.003   |
| <i>Cks1b</i>                      | NM_016904    | CDC28 protein kinase subunit 1b       | 1.6    | 0.000   |
| <i>Cdca5</i>                      | NM_026410    | cell division cycle-associated 5      | 1.6    | 0.000   |
| <i>Cdc45</i>                      | NM_009862    | cell division cycle 45 homolog        | 1.5    | 0.000   |
| <i>Ube2c</i>                      | NM_026785    | ubiquitin-conjugating enzyme E2C      | 2.2    | 0.000   |
| <i>Nek2</i>                       | NM_010892    | NIMA-related expressed                | 1.8    | 0.010   |
| <i>Birc5</i>                      | NM_001012273 | survivin                              | 1.8    | 0.000   |
| <i>Mad2l1</i>                     | NM_019499    | MAD2-like 1                           | 1.5    | 0.000   |
| <i>Pttg1</i>                      | NM_013917    | pituitary tumor-transforming 1        | 2.0    | 0.000   |
| <i>Aurka</i>                      | NM_011497    | serine/threonine protein kinase 6     | 1.8    | 0.000   |
| Inflammatory and immune response: |              |                                       |        |         |
| <i>Cfp</i>                        | NM_008823    | complement factor properdin           | 1.6    | 0.000   |
| <i>Ccr5</i>                       | NM_009917    | chemokine (C-C motif) receptor 5      | 2.4    | 0.000   |
| <i>Socs2</i>                      | NM_007706    | suppressor of cytokine signaling 2    | 2.5    | 0.000   |
| <i>Chga</i>                       | NM_007693    | chromogranin A                        | 3.5    | 0.000   |
| <i>Ccr1</i>                       | NM_009912    | chemokine (C-C motif) receptor 1      | 3.4    | 0.000   |
| <i>Ccr2</i>                       | NM_009915    | chemokine (C-C motif) receptor 2      | 1.8    | 0.000   |
| <i>Ifi30</i>                      | NM_023065    | interferon gamma inducible protein 30 | 1.8    | 0.004   |
| <i>Lgmn</i>                       | NM_011175    | legumain                              | 1.6    | 0.011   |
| <i>Sell</i>                       | NM_011346    | L-selectin                            | 1.8    | 0.000   |

**Table S5: Differential gene expression of telomerase protein subunit in *Fancd2*<sup>-/-</sup> or wild-type HSPCs in response to OXM administration, related to Table 2**

| Genotype                     | Symbol      | Gene ID   | Fold change | °Q value |
|------------------------------|-------------|-----------|-------------|----------|
| <i>Fancd2</i> <sup>-/-</sup> | <i>Tert</i> | NM_009354 | -1.05       | 0.27     |
| Wild-type                    | <i>Tert</i> | NM_009354 | 1.05        | 0.70     |

Note: °Q value cut-off was set at 0.05.

**Table S6: mRNA expression changes of critical EPO-inducible or target genes in wild-type basophilic erythroblasts in response to OXM administration, related to**

**Figure 5**

| Symbol           | RefSeq ID | Con1  | Con2  | Con3  | Oxm1  | Oxm2  | Oxm3  | Q value | AvgFC |
|------------------|-----------|-------|-------|-------|-------|-------|-------|---------|-------|
| <i>Cish</i>      | NM_009895 | 19    | 29    | 7     | 32    | 13    | 9     | 1       | n/a   |
| <i>Socs1</i>     | NM_009896 | 4     | 4     | 2     | 2     | 2     | 1     | 1       | n/a   |
| <i>Socs2</i>     | NM_007706 | 2     | 2     | 2     | 2     | 1     | 0     | 1       | n/a   |
| <i>Socs3</i>     | NM_007707 | 13    | 6     | 12    | 11    | 2     | 6     | 1       | n/a   |
| <i>Tfrc</i>      | NM_011638 | 67455 | 64327 | 61344 | 69170 | 64641 | 62324 | 1       | 1.02  |
| <i>Bcl2l1</i>    | NM_009743 | 6599  | 4948  | 6058  | 5929  | 5765  | 6129  | 1       | 1.01  |
| <i>Cdc25a</i>    | NM_007658 | 1500  | 1846  | 1660  | 1682  | 1648  | 1683  | 1       | 1.00  |
| <i>Btg3</i>      | NM_009770 | 0     | 1     | 2     | 0     | 1     | 0     | 1       | n/a   |
| <i>Ccnd2</i>     | NM_009829 | 26    | 8     | 13    | 11    | 7     | 9     | 1       | n/a   |
| <i>Lyl1</i>      | NM_008535 | 4573  | 4323  | 3953  | 4905  | 4293  | 4179  | 1       | 1.04  |
| <i>Pim3</i>      | NM_145478 | 131   | 84    | 54    | 83    | 75    | 81    | 1       | -1.13 |
| <i>Tnfrsf13c</i> | NM_028075 | 22    | 24    | 26    | 33    | 24    | 16    | 1       | n/a   |

The total reads for each library were normalized to 20 million. Columns Con1 thru Oxm3 showed the normalized reads for each gene in different libraries. Con1, Con2, and Con3 denote library 1, 2, and 3 for placebo-treated mice, respectively, whereas Oxm1, Oxm2, Oxm3 for OXM-treated mice. A Q value lower than 0.05 was considered as significant.

AvgFC denotes average fold change. When both the average OXM read and the average placebo read were below 50, the expression level of the particular gene was deemed as too low to calculate a fold change. Instead, n/a, which denotes not applicable, was filled in the AvgFC column.

**Table S7: Comparison of *Spp1* expression levels between KSL and basophilic erythroblast libraries, related to Table 2**

| Library                                  | Average normalized tag count for <i>Spp1</i> |
|------------------------------------------|----------------------------------------------|
| OXM-treated KSL cells                    | 146                                          |
| Placebo-treated KSL cells                | 1529                                         |
| OXM-treated basophilic erythroblasts     | 1.5                                          |
| Placebo-treated basophilic erythroblasts | 1.2                                          |

The total reads for each individual library were normalized to 20 million first. The tag count for *Spp1* gene shown here was the average of all six libraries in each condition. For any particular gene, an average tag greater than 50 was considered as true signal.

**Table S8: Primers used for qPCR amplification, related to Figure 3**

| Name   | Sequence                         | Note                                    |
|--------|----------------------------------|-----------------------------------------|
| MG3157 | 5' GTGGCGCGGGCGACTTCCAGT 3'      | For <i>ROSA26</i> transgenic allele     |
| MG3158 | 5' TCCGCGTGCAGCAGATGGCG 3'       |                                         |
| MG1711 | 5' GAGCTGCCTGATACGGATGCTG 3'     | For <i>Fancc</i> <sup>-/-</sup> allele  |
| MG1791 | 5' GGGCTGCTAAAGCGCATGCTC 3'      |                                         |
| MG3153 | 5' CACGGTGTGGTGGGCCAGGT 3'       | For <i>Fancd2</i> <sup>-/-</sup> allele |
| MG3154 | 5' GGGAGCCCTTGCATGACAATTCTGCT 3' |                                         |
| MG1711 | 5' GAGCTGCCTGATACGGATGCTG 3'     | For <i>Fancc</i> <sup>+/+</sup> allele  |
| MG1712 | 5' GAGAAATGGCTCAGTGGTTAAGAG 3'   |                                         |
| OatF   | 5' GCTGCCCTCTGACGTTGTGAC 3'      | For <i>Oat</i> RT-PCR                   |
| OatR   | 5' TCGAAGTCGCAGGCACACCT 3'       |                                         |
| TfrcF  | 5' GCGCTTCCTAGTACTCCCTTGT 3'     | For <i>Tfrc</i> RT-PCR                  |
| TfrcR  | 5' TGCCGAGCAAGGCTAAACCG 3'       |                                         |
| OpnF   | 5' CCTCCCTCCCGGTGAAAGTG 3'       | For <i>Spp1</i> RT-PCR                  |
| OpnR   | 5' GAGATGGGTCAGGCACCAGC 3'       |                                         |
| GapF   | 5' ATGGTGAAGGTCGGTGTGAACG 3'     | For <i>Gapdh</i> RT-PCR                 |
| GapR   | 5' GTCAATGAAGGGGTCGTTGATGGCA 3'  |                                         |
